# Supplementary material for: Anticancer drug impact on DNA – a study by neutron spectroscopy coupled with synchrotron-based FTIR and EXAFS
Source: Royal Society of Chemistry journal article supplement (doi:10.1039/c8cp05881d), 2019-01-01
Supplement: c8cp05881d1.pdf [file c8cp05881d1.pdf]

## Electronic Supplementary Information

### **Anticancer Drug Impact on DNA – A Study by Neutron Spectroscopy coupled to Synchrotron-based FTIR and EXAFS**

Ana L.M. Batista de Carvalho<sup>a</sup>, Adriana P. Mamede<sup>a</sup>, Asha Dopplapudi<sup>b</sup>, Victoria Garcia Sakai<sup>b</sup>, James Doherty<sup>c,d</sup>, Mark Frogley<sup>c</sup>, Gianfelice Cinque<sup>c</sup>, Peter Gardner<sup>d</sup>, Diego Gianolio<sup>c</sup>, Luís A.E. Batista de Carvalho<sup>a\*</sup> and Maria P.M. Marques<sup>a,e</sup>

<sup>a</sup>“Química-Física Molecular”, Department of Chemistry, University of Coimbra, 3004-535 Coimbra, Portugal

<sup>b</sup>ISIS Facility, STFC Rutherford Appleton Laboratory, Chilton, Didcot, Oxfordshire OX11 0QX, UK

<sup>c</sup>Diamond Light Source, Harwell Science and Innovation Campus, Chilton, Didcot, Oxfordshire OX11 0DE, UK

<sup>d</sup>Manchester Institute of Biotechnology, University of Manchester, Manchester, M1 7DN, UK

<sup>e</sup>Department of Life Sciences, University of Coimbra, 3000-456 Coimbra, Portugal

## **Table of Contents**

### Experimental

Chemicals  
Synthesis and Characterisation of the Complexes  
Preparation of Drug Solutions  
Synthesis and Characterisation of the Drug–Purine Adducts  
Cell Culture  
DNA Extraction  
QENS Fundamentals and Measurements  
Synchrotron-based FTIR-ATR Measurements  
EXAFS Experiments  
Data Pre-processing and Analysis

### Figures

Figure S1 – EXAFS fits for Fourier Transform of  $k^3$ -weighted  $\chi(k)$  data (both magnitude and imaginary parts) – (A) Pd K-edge; (B) Pt L3-edge.

The experimental data is represented in black; the metal-ligand contributions to the EXAFS signal are shown in different colours: M–N red, M–S blue, M–Cl green.

Figure S2 – Normalized XANES data for MA4+GSH and MG4+GSH, with the corresponding linear combination fits (LCF, grey dashed lines) and standards used for the fit (MA4, MGS4) – (A) Pd K-edge; (B) Pt L3-edge.

Figure S3 – Setting of the samples onto the ATR Diamond accessory of MIRIAM beamline (Diamond Light Source, UK) for data measurement.

The HDPE disk covering the sample ( $d=30$  mm), represented in (B), was positioned upside down onto the ATR crystal and the ATR lever was placed in the centre of the circle containing the solid sample.

Figure S4 – QENS profiles, without normalisation (all  $Q$  values, logarithmic scale), for untreated and drug-treated  $H_2O$ -DNA<sub>hyd</sub> samples, at 298 K.

### References

## Experimental Section

### Chemicals

Adenine (>99%), antibiotics (penicillin-streptomycin 100× solution), Dulbecco's Modified Eagle's Medium – high glucose (DMEM-HG, 4500 mg/L glucose), *cis*-dichlorodiammine platinum(II) (cisplatin, >98%), deoxyribonucleic acid (sodium salt from calf thymus, type I, fibers), ethylenediaminetetraacetic acid (EDTA, disodium salt, dihydrate), formalin (10% neutral-buffered formalin, *ca.* 4% formaldehyde), guanine (98%), L-glutathione reduced (>98%), isopropyl alcohol, phosphate buffered saline (PBS), potassium tetrachloropalladate(II) ( $K_2PdCl_4$ , >99.9%), potassium tetrachloroplatinate(II) ( $K_2PtCl_4$ , >99.9%), *N,N'*-bis(3-aminopropyl)-1,4-diaminobutane (spermine, free base), silver nitrate (>99%), tetraammineplatinum(II) nitrate (99.99%), Trypan blue (0.4% w/v), trypsin-EDTA (1×), as well as solvents, inorganic salts and acids (of analytical grade) were purchased from Sigma-Aldrich Chemical S.A. (Sintra, Portugal). Fetal bovine serum (FBS) was obtained from Gibco-Life Technologies (Porto, Portugal), and the TRIzol® reagent was acquired from Invitrogen (Porto, Portugal).

### Synthesis and Characterisation of the Complexes

The  $Pt_2Spm$  and  $Pd_2Spm$  complexes were synthesised according to published procedures<sup>1</sup> optimised by the authors<sup>2</sup>: 2 mmol of  $K_2PtCl_4$  or  $K_2PdCl_4$ , respectively, were dissolved in a minimal amount of water and an aqueous solution containing 1 mmol of spermine was added dropwise under continuous stirring. After 24 h, the resulting yellow/orange powder (for the Pt(II) and Pd(II) complexes, respectively) was filtered off and washed with acetone, yellow-orange needle-shaped crystals having been obtained by recrystallization from water. The newly synthesised compounds were fully characterised (and tested as to their purity) by elemental analysis and vibrational spectroscopy – FTIR, Raman and inelastic neutron scattering (INS), which were compared with the previously calculated vibrational profiles (by *ab initio* methods<sup>2,3</sup>).

$Pt_2Spm$  (yield 60%) – Elemental analysis, Found (for  $Pt_2(C_{10}N_4H_{26})Cl_4$ ): C: 16.2%; H: 3.5%; N: 7.6%, Cl: 19.1%; Calculated – C: 16.4%; H: 3.6%; N: 7.5%, Cl: 19.3%.  $Pd_2Spm$  (yield 68%) – Elemental analysis, Found (for  $Pd_2(C_{10}N_4H_{26})Cl_4$ ): C: 21.2%; H: 4.7%; N: 9.6%, Cl: 25.9%; Calculated – C: 21.5%; H: 4.6%; N: 9.9%, Cl: 25.6%.

The FTIR spectra of the solid  $Pt_2Spm$  and  $Pd_2Spm$  complexes were obtained (at room temperature, in KBr disks *ca.* 0.5% (w/w)) in a Bruker Optics Vertex 70 FTIR spectrometer, coupled to a KBr beamsplitter and a liquid nitrogen cooled Mercury Cadmium Telluride (MCT) detector. Each spectrum was the sum of 50 scans, at a  $2\text{ cm}^{-1}$  resolution, the error in wavenumbers being less than  $1\text{ cm}^{-1}$ . The Raman data were acquired (at room temperature) in a Bruker RFS-100 Fourier transform Raman spectrometer, equipped with an InGaAs detector, with near-infrared excitation (in order to overcome fluorescence) provided by the 1064 nm line of a Nd:YAG laser (Coherent, model Compass-1064/500N), yielding *ca.* 150 mW at the sample position. A  $180^\circ$  geometry was employed and each spectrum was the average of three repeated measurements of 50 scans each, resolution being set to  $2\text{ cm}^{-1}$ . The INS measurements were performed (at 5 K) at the ISIS Pulsed Neutron and Muon Source of the Rutherford Appleton Laboratory (United Kingdom), using the indirect geometry time-of-flight, high resolution ( $(\Delta E/E)$  *ca.* 1.25 %), broad range TOSCA spectrometer.<sup>4,5</sup>

### Preparation of Drug Solutions

Stock solutions were prepared in PBS – cisplatin-1 mM,  $Pt_2Spm$ -250  $\mu\text{M}$  and  $Pd_2Spm$ -500  $\mu\text{M}$  – sterile-filtered and stored at  $-20^\circ\text{C}$ . Further dilutions to the final desired concentrations were made in PBS, immediately before administration to the cells. Preparation of the samples in isotonic media (PBS) avoided early chloride hydrolysis of the complexes (drug activation), that only took place within the cell, after administration.

### Synthesis and Characterisation of the Drug–Purine Adducts

Drug-adenine and drug-guanine adducts (MA4 and MG4,  $M=Pt(II)$  or  $Pd(II)$ ) were synthesised in (1:4) molar ratios, following an optimised synthetic route based on reported methods.<sup>6,7</sup>  $Pd_2Spm$  and  $Pt_2Spm$  aqueous solutions, 0.45 mM and 0.25 mM respectively, were prepared. In an initial step, hydrolysis of the chloride ligands was induced by adding 1.9 molar equivalents of  $AgNO_3$  while stirring at  $40^\circ\text{C}$ , in the dark, for approximately 1 h. The activated drug solutions were then vacuum filtered through a  $0.22\text{ }\mu\text{m}$  filter (to remove  $AgCl$ ) and 4 molar equivalents of purine base (either A or G) were added to yield (1:4) adducts (hereafter denominated  $Mbase_4$ ,  $M=Pt$  or  $Pd$ , base=A or G). These solutions were stirred for *ca.* 40 h at  $30^\circ\text{C}$ , in the dark, and then filtered ( $0.22$

µm filter) to discard traces of unreacted purines. The pH was adjusted to 3.9 for drug-guanine and to 5.1 for drug-adenine solutions. Finally, concentration by rotary evaporation under vacuum and lyophilisation were performed, the resulting solid products being stored at room temperature, in the dark.

### **Cell Culture**

The epithelial human breast cancer cell line MDA-MB-231 (human Caucasian triple-negative, claudin-low, breast carcinoma) was purchased from the Leibniz-Institut DSMZ GmbH (Germany).<sup>8</sup> The cells were cultured as monolayers, at 37 °C, in a humidified atmosphere of 5% CO<sub>2</sub>. The cultures were maintained in DMEM-HG medium supplemented with 10% (v/v) heat-inactivated FBS, 1% (v/v) penicillin (100 U/mL)/streptomycin (100 mg/mL) and sodium bicarbonate-20 mM (pH 7.4). Cells were subcultured at 80% confluence, using trypsin-EDTA (1×). Under these conditions, the population doubling time was 26 h.

### **DNA Extraction**

DNA was extracted from MDA-MB-231 cells (henceforth denominated DNA<sub>pellet</sub>), both untreated and treated with either cisplatin or Pd<sub>2</sub>Spm: a pellet of 2×10<sup>7</sup> cells was homogenised in 1 mL of TRIzol<sup>®</sup> reagent<sup>9</sup> and incubated for 5 min, after which 200 µL of chloroform were added and the solution was centrifuged for 15 min at 12000×g (4° C). The aqueous phase was discarded, DNA was precipitated from the interphase with 300 µL of ethanol (≥99.8%) and centrifuged for 5 min at 2000×g (4° C). The resulting pellet was then resuspended in 1 mL of sodium citrate solution (0.1 M in 10% ethanol, pH 8.5) and centrifuged for 5 min at 2000×g (4° C). This pellet was resuspended in 1.5 mL of 75% ethanol and stored at 4° C. All samples were prepared in triplicate. DNA yield and purity was assessed by measuring its absorbance at 260 and 280 nm (in an aqueous solution).

The DNA hydration level was confirmed by FTIR-ATR<sup>10</sup> in a Bruker Optics Vertex 70 spectrometer with a Platinum ATR single reflection diamond accessory, using a silicon solid state beamsplitter and a Deuterated L-alanine doped TriGlycine Sulphate (DLATGS) detector with a polyethylene window. Spectra were the sum of 64 scans, at a 2 cm<sup>-1</sup> resolution (accuracy in wavenumbers <1 cm<sup>-1</sup>) and the 3-term Blackman–Harris apodization function was applied.

### **QENS Fundamentals and Measurements**

Exploiting the high sensitivity of neutrons to hydrogen (with a much larger incoherent scattering cross section compared to that of other elements), QENS typically analyses the incoherent scattering signal resulting from a variety of atomic motions ranging from fast vibrational and rotational localised modes, to slower diffusional modes, motions taking place at pico- to nanosecond timescales. The signal, the so-called dynamic structure factor,  $S(Q, \omega)$ , arises from energy ( $\hbar\omega$ ) and momentum ( $Q$ ) exchanges between the neutrons and the atoms within a given spectrometer resolution, and is detected as a broadening about an elastic line of energy exchange  $\approx 0$ . The measured signal can be mathematically expressed as:

$$S_{\text{measured}}(Q, \omega) = \exp\left(-\frac{\hbar\omega}{2kT}\right) R(Q, \omega) \otimes S(Q, \omega) \quad (1)$$

where the exponential term is a detailed balance parameter, and  $R(Q, \omega)$  is the instrument's resolution function (experimentally obtained) which is convoluted with the scattering model ( $S(Q, \omega)$ ) that describes the dynamical behaviour of the sample. In biological samples,  $S(Q, \omega)$  is dominated by the incoherent scattering of the hydrogens which are distributed throughout the atomic structures, and are approximated as the convolution of vibrational, rotational and translational components (assumed as independent motions),

$$S_{\text{inc}}(Q, \omega) = S_{\text{vib}}(Q, \omega) \otimes S_{\text{rot}}(Q, \omega) \otimes S_{\text{trans}}(Q, \omega) \quad (2)$$

Strictly in the elastic and quasielastic regions,

$$S_{\text{inc}}(Q, \omega) = \exp(-Q^2 \langle u^2 \rangle) [A_0(Q) \delta(\omega) + (1 - A_0(Q)) L(Q, \omega)] \quad (3)$$

where the exponential term is the Debye-Waller factor,  $A_0(Q) \delta(\omega)$  is the elastic contribution due to motions slower than the longest observable time as defined by the energy resolution of the spectrometer, and the second term in the equation corresponds to the quasielastic component.  $S_{\text{inc}}(Q, \omega)$  provides time/space information on the system probed, on the timescale of the dynamical processes (through the neutron energy transfer,  $\omega$ ), and

on the spatial extent of these processes (from the momentum scattering transfer,  $Q$ ). Once the QENS data in the time-domain is represented by an exponential, it can be approximated in the energy domain by Lorentzian functions of different widths,

$$L(x) = \frac{1}{\pi} \frac{\Gamma}{\Gamma^2 + \omega^2} \quad (4)$$

$\Gamma$  being the full width at half-maximum (FWHM=2xHWHM (half-width at half-maximum)). These Lorentzian functions describe motions occurring on different timescales, detailed information on each dynamic component being retrieved from the  $Q$ -dependency of  $\Gamma$ .

QENS data were acquired at the ISIS Pulsed Neutron and Muon Source of the Rutherford Appleton Laboratory (United Kingdom),<sup>11</sup> on the low-energy OSIRIS high-flux indirect-geometry time-of-flight spectrometer,<sup>12</sup> equipped with a newly installed beryllium filter<sup>13</sup> and using the 002 reflection of the cooled pyrolytic graphite analyser bank (PG002 50Hz configuration) with a 25.4  $\mu\text{eV}$  energy resolution (FWHM). The data was recorded in the  $Q$  range 0.18 to 1.60  $\text{\AA}^{-1}$  (covering a  $11^\circ$  to  $155^\circ$  angular interval, for a total of 42 detectors grouped into 14 sets), within the energy transfer window -0.6 to 0.6 meV.

### ***Synchrotron-based FTIR-ATR Measurements***

FTIR-ATR spectra were recorded at the Multimode InfraRed Imaging And Microspectroscopy (MIRIAM) beamline B22 from the Diamond Light Source (United Kingdom),<sup>14,15</sup> in a Bruker Vertex 80v Fourier Transform IR interferometer, using a single reflection diamond accessory with two distinct set ups: (i) in the far-IR (FIR), a 40-700  $\text{cm}^{-1}$  spectral interval was measured using a liquid He-cooled 4.2 K bolometer (in regular mode) and a 6 *micron* Mylar beamsplitter; (ii) in the mid-IR (MIR), a 400-8000  $\text{cm}^{-1}$  range was probed using a liquid  $\text{N}_2$ -cooled broadband Mercury Cadmium Telluride (MCT) detector and a broadband KBr beamsplitter. For each measurement, 1024 (FIR) or 512 (MIR) co-added interferograms were collected at a 2  $\text{cm}^{-1}$  resolution (for both the sample and the background), at a scanner velocity of 80 kHz (FIR) or 40 kHz (MIR) (relative to the 15797  $\text{cm}^{-1}$  laser reference). 10 spectra were collected *per* sample, a background being taken before and after each measurement. Under these conditions, the final spectra sampling was better 1  $\text{cm}^{-1}$ . Two replicates were acquired for each sample, at each experimental condition (FIR and MIR).

The samples (*ca.* 100-150  $\mu\text{l}$ ) were placed onto the diamond ATR accessory in the sample compartment (kept under vacuum), covered by a high-density polyethylene (HDPE) disk (*ca.* 1 $\times$ 30 mm), which was sealed with parafilm to avoid sample leakage (Figure S1). The ATR crystal was cleaned with ethanol (77%) followed by isopropanol (99%), and carefully wiped between measurements.

### ***EXAFS Experiments***

X-ray absorption experiments (simultaneous EXAFS and XANES) were performed at the B18 beamline of the Diamond Light Source.<sup>16</sup> All the samples were analysed in both the solid state and in solution. The former were measured as self-supported pellets ( $d=8$  mm) using cellulose powder as blank, its thickness having been optimised to obtain an edge jump close to one. The solutions were measured in Eppendorf vials (2 ml) centered in order to maximize the beam path through the sample.

The experiments were performed using a Cr-coated branch of collimating and focusing mirrors and a Si(111) double-crystal monochromator for the Pt-compounds, and a Pt-coated branch with a Si(311) monochromator for the Pd-compounds. The size of the beam at the sample position was approximately 1 mm (h) $\times$ 0.5 mm (v). For the solid samples, data were acquired in transmission mode, with ion chambers before and after the sample filled with appropriate mixtures of inert gases to optimise sensitivity: 10 – 80 mbar of Ar and 920 mbar of He, resulting in an overall efficiency of 15%; 10 – 250 mbar of Kr and 750 mbar of He, with a 60% efficiency. Regarding the solutions, data were acquired in fluorescence mode by means of a 36-elements Ge detector at  $90^\circ$  with respect to incident beam.

The XAS data were collected in quick EXAFS mode, by scanning the monochromator continuously. The EXAFS spectra at the Pt L3-edge (11564 eV, for the Pt compounds) and at the Pd K edge (24350 eV, for the Pd samples) were obtained from 200 eV before the edge to 1200 eV after the edge (corresponding to 18  $\text{\AA}^{-1}$  in  $k$ -space), with a constant step size equivalent to 1 eV. An average of 10 scans (*ca.* 3 min each) were acquired for

each sample (in order to attain a good signal-to-noise ratio), at both room temperature and 90 K (inside a liquid nitrogen cryostat).

### **Data Pre-processing and Analysis**

The quasi-elastic neutron scattering data was reduced from raw time-of-flight signals into energy transfer spectra using the MANTID program (version 3.11.0<sup>17</sup>). QENS spectra were corrected for detector efficiency. Resolution functions were determined independently from calibration runs: (i) for vanadium, used for the isolated drugs; (ii) for drug-free H<sub>2</sub>O-hydrated, D<sub>2</sub>O-hydrated and dehydrated (commercial) DNA, applied for the corresponding drug-containing samples.

Fitting of the QENS spectra was performed for the energy transfer range -0.6 to 0.6 meV, with the program DAVE (version 2.3, developed at the National Institute of Standards and Technology (NIST) Center for Neutron Research<sup>18</sup>). The systems were accurately represented by applying one Dirac Delta function (elastic component), and two Lorentzians (quasielastic contributions) characterising fast localised rotations of DNA's methyls, and possibly also of NH<sub>2</sub> groups not involved in H-bonds ( $L_{\text{local}}(Q, \omega)$ , broad Lorentzian) and the slow motions of the biomolecule's hydration water and side-chain moieties ( $L_{\text{global}}(Q, \omega)$ , narrow Lorentzian), equation (3) becoming,

$$S_{\text{inc}}(Q, \omega) = \exp(-Q^2 \langle u^2 \rangle) [A_0(Q) \delta(\omega) + (1 - A_0(Q)) L_{\text{local}}(Q, \omega)] \otimes L_{\text{global}}(Q, \omega) \otimes \text{RF}(Q) \quad (5)$$

(where RF represents the instrument resolution function from measurements from a vanadium sample which is a purely elastic incoherent scatterer). No background correction was found to be needed. Only detector groups 3 to 11 were considered in the fitting, the others having been discarded.

FWHM values were extracted from each of the Lorentzian functions, and the translational diffusion coefficients ( $D_T$ ) and reorientation times ( $\tau_T^{\text{jump}}$ , the mean residence time of a water molecule in each possible location) (at temperature  $T$ ) were obtained according to a jump-reorientation mechanism<sup>19,20</sup> that follows the equation:

$$\Gamma_T(Q) = \frac{D_T Q^2}{1 + D_T Q^2 \tau_T^{\text{jump}}} \quad (6)$$

Synchrotron-based FTIR-ATR data acquisition was performed using OPUS 7.5, which compensated for atmospheric water vapour and carbon dioxide interferences, and corrected for background intensity changes within the chosen wavenumber interval as well as for the frequency dependence of the penetration depth of the electric field in ATR (refraction coefficient=2.4). A Blackman-Harris 4-term apodization function was applied during processing, using a zero-filling factor of 2 and a power phase correction to yield a spectral data point spacing of 2 cm<sup>-1</sup>.

EXAFS/XANES results were normalised using the program Athena,<sup>21</sup> with a linear pre-edge and polynomial post-edge background subtracted from the raw  $\ln(I_t/I_0)$  data. Fitting of the experimental data was carried out using the software Artemis that is based on the FEFF code<sup>22</sup> for theoretical calculation of the scattering paths' intensities and phases contributing to the EXAFS signal. EXAFS fits were performed in the following ranges: 2 to 16.5 ang<sup>-1</sup> in  $k$ -space; 1.1 to 2.5 ang<sup>-1</sup> in  $R$ -space. All XANES fits were carried out in the -20 to +60 and -20 to +100 eV ranges for Pt- and Pd-samples respectively. PtA<sub>4</sub>, PtGS<sub>4</sub>, PdA<sub>4</sub> and PdGS<sub>4</sub> were used as standards.

## Figures

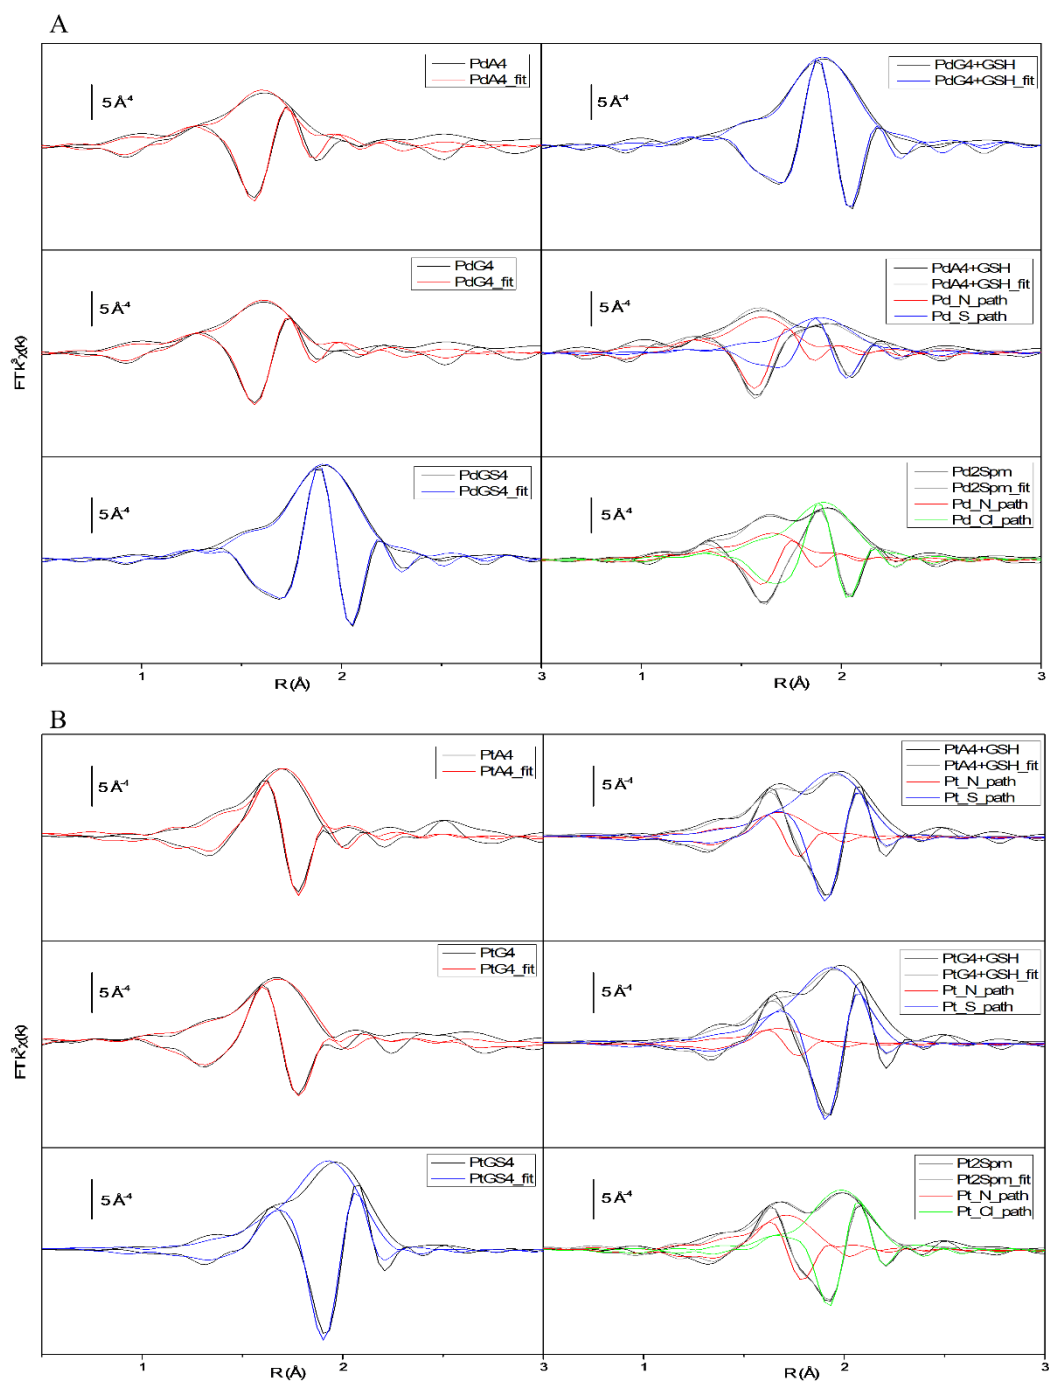

Figure S1 EXAFS fits for Fourier Transform of  $k^3$ -weighted  $\chi(k)$  data (both magnitude and imaginary parts) – (A) Pd K-edge; (B) Pt L3-edge. The experimental data is represented in black; the metal-ligand contributions to the EXAFS signal are shown in different colours: M–N red, M–S blue, M–Cl green.

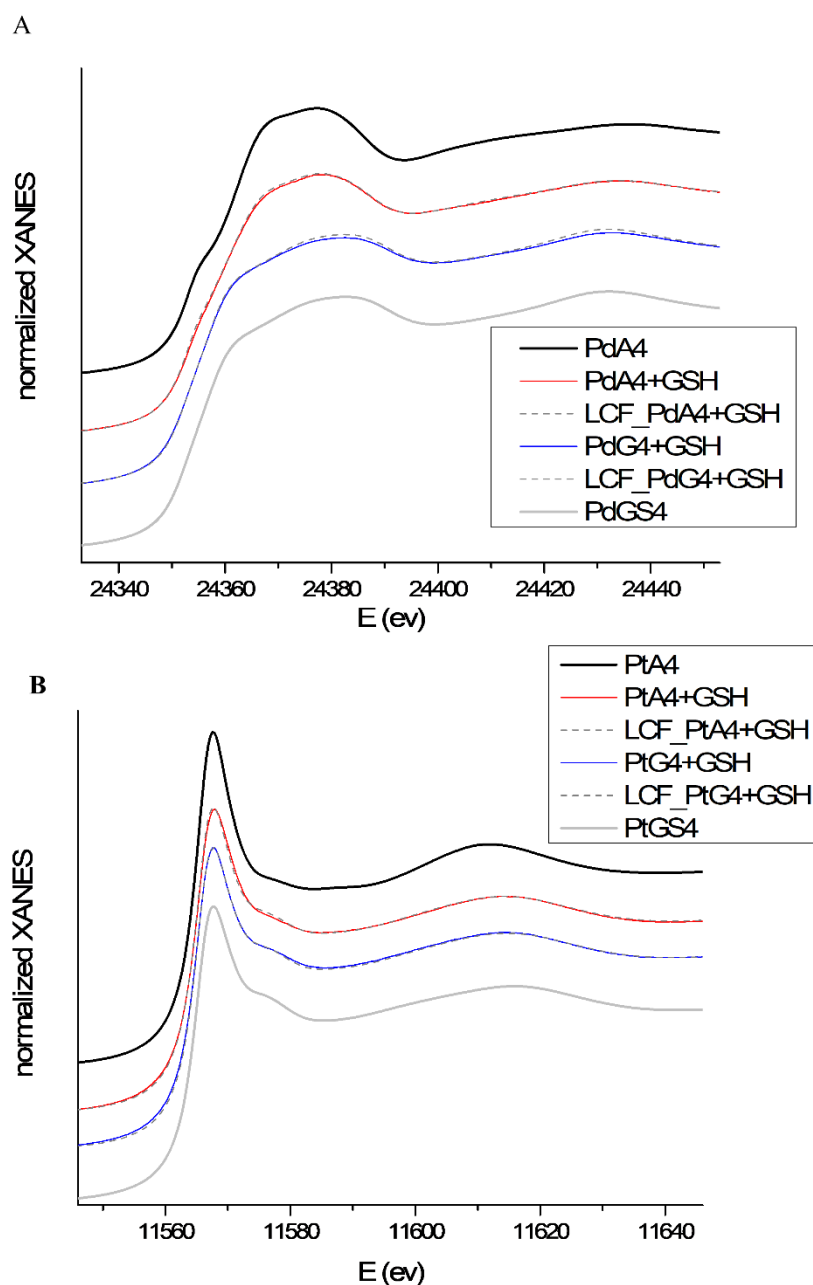

Figure S2 Normalized XANES data for MA4+GSH and MG4+GSH, with the corresponding linear combination fits (LCF, grey dashed lines) and standards used for the fit (MA4, MGS4) – (A) Pd K-edge; (B) Pt L3-edge.

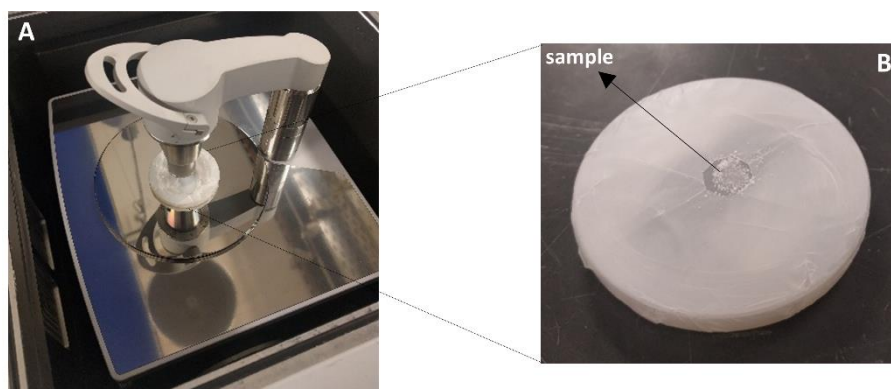

Figure S3 Setting of the samples onto the ATR Diamond accessory of MIRIAM beamline (Diamond Light Source, UK) for data measurement. The HDPE disk covering the sample (d=30 mm), represented in (B), was positioned upside down onto the ATR crystal and the ATR lever was placed in the centre of the circle containing the solid sample.

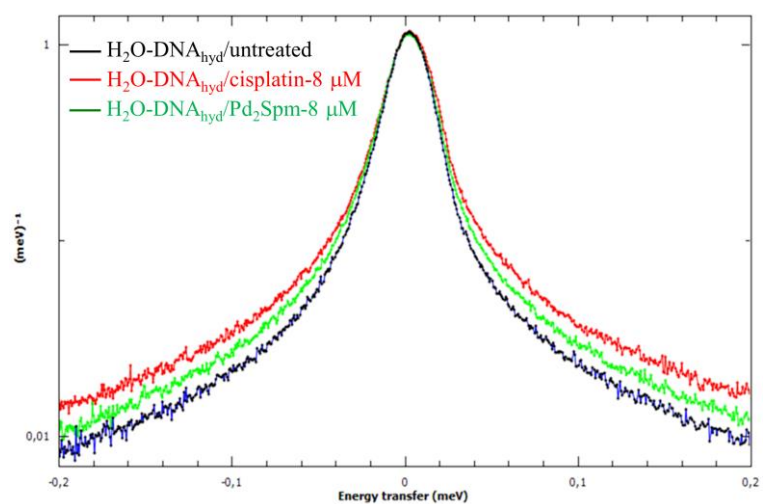

Figure S4 QENS profiles, without normalisation (all Q values, logarithmic scale), for untreated and drug-treated  $\text{H}_2\text{O-DNA}_{\text{hyd}}$  samples, at 298 K.

## References

1. G. Codina, A. Caubet, C. Lopez, V. Moreno and E. Molins, *Helv Chim Acta*, 1999, **82**, 1025.
2. S. M. Fiuza, A. M. Amado, S. F. Parker, M. P. M. Marques and L. A. E. Batista de Carvalho, *New J Chem*, 2015, **39**, 6274.
3. L. A. E. Batista de Carvalho, M. P. M. Marques, C. Martin, S. F. Parker and J. Tomkinson, *ChemPhysChem*, 2011, **12**, 1334.
4. ISIS - STFC - TOSCA, <http://www.isis.stfc.ac.uk/instruments/tosca/>, Accessed 21/01/2018.
5. S. F. Parker, F. Fernandez-Alonso, A. J. Ramirez-Cuesta, J. Tomkinson, S. Rudic, R. S. Pinna, G. Gorini and J. F. Castanon, *Dynamics of Molecules and Materials-II*, 2014, **554**, 012003.
6. B. Lippert, G. Raudaschl, C. J. L. Lock and P. Pilon, *Inorg Chim Acta*, 1984, **93**, 43.
7. H. Schoellhorn, G. Raudaschl-Sieber, G. Mueller, U. Thewalt and B. Lippert, *J Am Chem Soc*, 1985, **107**, 5932.
8. ECACC, <http://bit.ly/1OgAjDi>, Accessed 18/09/2015.
9. P. Chomczynski, *BioTechniques*, 1993, **15**, 532.
10. B. R. Wood, *Chem Soc Rev*, 2016, **45**, 1980.
11. ISIS - STFC - OSIRIS, <http://www.isis.stfc.ac.uk/instruments/osiris/>, Accessed 21/01/2018.
12. M. T. F. Telling and K. H. Andersen, *Phys Chem Chem Phys*, 2005, **7**, 1255.
13. F. Demmel, D. McPhail, J. Crawford, D. Maxwell, K. Pokhilchuk, V. Garcia-Sakai, S. Mukhopadhyay, M. T. F. Telling, F. J. Bermejo, N. T. Skipper and F. Fernandez-Alonso, *Epj Web Conf*, 2015, **83**, 03003.
14. G. Cinque, M. Frogley, K. Wehbe, J. Filik and J. Pijanka, *Synchrotron Radiation News*, 2011, **24**, 24.
15. Diamond Light Source, <http://www.diamond.ac.uk/>, Accessed 18/05/2018.
16. A. J. Dent, G. Cibir, S. Ramos, A. D. Smith, S. M. Scott, L. Varandas, M. R. Pearson, N. A. Krumpa, C. P. Jones and P. E. Robbins, *14<sup>th</sup> International Conference on X-Ray Absorption Fine Structure (XAFS14), Proceedings*, 2009, 190.
17. O. Arnold, J. C. Bilheux, J. M. Borreguero, A. Buts, S. I. Campbell, L. Chapon, M. Doucet, N. Draper, R. F. Leal, M. A. Gigg, V. E. Lynch, A. Markyadsen, D. J. Mikkelsen, R. L. Mikkelsen, R. Miller, K. Palmen, P. Parker, G. Passos, T. G. Perring, P. F. Peterson, S. Ren, M. A. Reuter, A. T. Savici, J. W. Taylor, R. J. Taylor, R. Tolchenoy, W. Zhou and J. Zikoysky, *Nuc. Instrum Methods Phys Res*, 2014, **764**, 156.
18. R. T. Azuah, L. R. Kneller, Y. M. Qiu, P. L. W. Tregenna-Piggott, C. M. Brown, J. R. D. Copley and R. M. Dimeo, *J Res Natl Inst Stand Technol*, 2009, **114**, 341.
19. D. Laage and J. T. Hynes, *Science*, 2006, **311**, 832.
20. D. Laage, *J Phys Chem B*, 2009, **113**, 2684.
21. B. Ravel and M. Newville, *Journal of Synchrotron Radiation*, 2005, **12**, 537.
22. J. J. Rehr, R. C. Albers and S. I. Zabinsky, *Phys Rev Lett*, 1992, **69**, 3397.
